# Supplementary material for: The ER stress response mediator ERO1 triggers cancer metastasis by favoring the angiogenic switch in hypoxic conditions
Source: PubMed Central journal article supplement (PMC7932925; doi:10.1038/s41388-021-01659-y), 2021-02-02
Supplement: 41388_2021_1659_MOESM2_ESM.pdf [file 41388_2021_1659_MOESM2_ESM.pdf]

| Process network analysis report significantly altered proteins in ERO1 KO vs WT hypoxic condition (Wilcoxon Mann Whitney test, p<0.05). |                                                      |       |           |                |           |           |         |                                                                                                              |
|-----------------------------------------------------------------------------------------------------------------------------------------|------------------------------------------------------|-------|-----------|----------------|-----------|-----------|---------|--------------------------------------------------------------------------------------------------------------|
| Enrichment by Process Networks                                                                                                          |                                                      |       |           | All_KO vs WT I |           |           |         |                                                                                                              |
| #                                                                                                                                       | Networks                                             | Total | pValue    | Min FDR        | p-value   | FDR       | In Data | Network Objects from Active Data                                                                             |
| 1                                                                                                                                       | Protein folding_Response to unfolded proteins        | 71    | 1,962E-09 | 2,080E-07      | 1,962E-09 | 2,080E-07 | 11      | Endoplasmin, HSP90 alpha, HSP90 beta, HSC70, GRP78, DNAJC3, HSP60, HYOU1, HSPA2, VCP, Hdj-2                  |
| 2                                                                                                                                       | Protein folding_Folding in normal condition          | 119   | 4,751E-07 | 2,518E-05      | 4,751E-07 | 2,518E-05 | 11      | Endoplasmin, HSP90 alpha, HSP90 beta, Sti1, HSC70, DNAJC3, HSP60, HYOU1, HSPA2, TCP1-beta, Hdj-2             |
| 3                                                                                                                                       | Protein folding_ER and cytoplasm                     | 44    | 2,395E-05 | 8,463E-04      | 2,395E-05 | 8,463E-04 | 6       | UGCG1, HSC70, GRP78, DNAJC3, HYOU1, VCP                                                                      |
| 4                                                                                                                                       | Translation_Elongation-Termination                   | 233   | 6,212E-05 | 1,646E-03      | 6,212E-05 | 1,646E-03 | 12      | DDX1, RPL7A, eEF1D, SRP72, IleRS, GlyRS, DARS, TyrRS, ValRS2, RP40, RPL14, MARS                              |
| 5                                                                                                                                       | Cytoskeleton_Intermediate filaments                  | 81    | 1,001E-04 | 2,122E-03      | 1,001E-04 | 2,122E-03 | 7       | TMPOA, Plectin 1, Vimentin, Keratin 18, Lamin B1, TMPOB, Lamin A/C                                           |
| 6                                                                                                                                       | Immune response_Phagosome in antigen presentation    | 243   | 3,957E-04 | 6,990E-03      | 3,957E-04 | 6,990E-03 | 11      | Endoplasmin, PSMD14, HSP90 alpha, HSP90 beta, Profilin I, Gelsolin, CDC42, GRP78, NF-kB p65/p65, PSMD11, VCP |
| 7                                                                                                                                       | Transcription_mRNA processing                        | 160   | 1,353E-03 | 2,049E-02      | 1,353E-03 | 2,049E-02 | 8       | hnRNP A2, Prp8, DDX1, SNRP116, SF3A1, DDX39, Mago nashi, SF3B1                                               |
| 8                                                                                                                                       | Immune response_Antigen presentation                 | 197   | 4,925E-03 | 6,526E-02      | 4,925E-03 | 6,526E-02 | 8       | Endoplasmin, PSMD14, HSP90 alpha, HSP90 beta, ECM29, GRP78, NF-kB p65/p65, PSMD11                            |
| 9                                                                                                                                       | Protein folding_Protein folding nucleus              | 58    | 7,549E-03 | 7,790E-02      | 7,549E-03 | 7,790E-02 | 4       | HSC70, GRP78, HYOU1, DJ-1                                                                                    |
| 10                                                                                                                                      | Cell adhesion_Integrin-mediated cell-matrix adhesion | 214   | 8,021E-03 | 7,790E-02      | 8,021E-03 | 7,790E-02 | 8       | TGM2, Filamin C, Profilin I, ITGA6, ITGB4, ITGA2, CDC42, Cyr61                                               |
