# Supplementary material for: The ER stress response mediator ERO1 triggers cancer metastasis by favoring the angiogenic switch in hypoxic conditions
Source: Oncogene. 2021 Feb 2;40(9):1721–36. doi: 10.1038/s41388-021-01659-y (PMC7932925; doi:10.1038/s41388-021-01659-y)
Supplement: Supplementary file 3 — Supplemental table 2 [file 41388_2021_1659_MOESM3_ESM.pdf]

| Enrichment analysis report using all identified secreted proteins in ERO1 KO and WT in hypoxic condition |                                                                             |       |           |           |                          |           |         |                                                                                                                                                                                                                                   |
|----------------------------------------------------------------------------------------------------------|-----------------------------------------------------------------------------|-------|-----------|-----------|--------------------------|-----------|---------|-----------------------------------------------------------------------------------------------------------------------------------------------------------------------------------------------------------------------------------|
| Enrichment by Pathway Maps                                                                               |                                                                             |       |           |           | Secteted all Hx_genelist |           |         |                                                                                                                                                                                                                                   |
| #                                                                                                        | Maps                                                                        | Total | pValue    | Min FDR   | p-value                  | FDR       | In Data | Network Objects from Active Data                                                                                                                                                                                                  |
| 1                                                                                                        | Beta-catenin-dependent transcription regulation in colorectal cancer        | 36    | 7,989E-13 | 7,022E-10 | 7,989E-13                | 7,022E-10 | 13      | CD44, ELAVL1 (HuR), Tenascin-C, CD44 soluble, PLAU (UPA), LAMC2, LAMC2 (80kDa), LAMC2 (100kDa), L1CAM, Calcyclin, MMP-14, CD44 (EXT), Lamin A/C                                                                                   |
| 2                                                                                                        | CFTR folding and maturation (normal and CF)                                 | 24    | 6,953E-11 | 2,063E-08 | 6,953E-11                | 2,063E-08 | 10      | Csp, ERp29, Sti1, HSP40, HSP105, HSP90 alpha, BAG-3, HSP90 beta, PARP-1, GANAB                                                                                                                                                    |
| 3                                                                                                        | Transcription_HIF-1 targets                                                 | 95    | 7,042E-11 | 2,063E-08 | 7,042E-11                | 2,063E-08 | 17      | G3P2, <b>Tfr1 (TFRC)</b> , LDHA, <b>IBP1</b> , Nucleophosmin, <b>Galectin-1 (LGALS1)</b> , Thrombospondin 1, ALDOC, <b>PLAU, PAI1 (SERPINE1)</b> PGK1, ENO1, <b>TGFB1</b> , ALDOA, <b>CTGF</b> , PKM2, Lysyl oxidase, <b>IBP3</b> |
| 4                                                                                                        | Cell adhesion_ECM remodeling                                                | 55    | 3,353E-10 | 7,368E-08 | 3,353E-10                | 7,368E-08 | 13      | IBP4, CD44, TIMP2, PLAT (TPA), MSN (moesin), Fibronectin, MMP-1, PAI1, MMP-13, PLAU (UPA), TIMP1, MMP-14, VIL2 (ezrin)                                                                                                            |
| 5                                                                                                        | Role of metalloproteases and heparanase in progression of pancreatic cancer | 33    | 4,847E-08 | 8,520E-06 | 4,847E-08                | 8,520E-06 | 9       | CD44, Alpha 1-antitrypsin, TIMP2, MMP-1, VEGF-A, CD44 soluble, TIMP1, MMP-14, CD44 (EXT)                                                                                                                                          |
| 6                                                                                                        | Role of TGF-beta 1 in fibrosis development after myocardial infarction      | 38    | 1,846E-07 | 2,496E-05 | 1,846E-07                | 2,496E-05 | 9       | COL1A1, TIMP2, Thrombospondin 1, TGFB1, Fibronectin, Tenascin-C, MMP-1, PAI1, TIMP1, CTGF                                                                                                                                         |
| 7                                                                                                        | Gamma-secretase proteolytic targets                                         | 76    | 1,988E-07 | 2,496E-05 | 1,988E-07                | 2,496E-05 | 12      | CD44, alphaAPPs, APP-C99, APP-C83 (CTF), APP-C59 (AICD), CD44 soluble, Amyloid beta 40, CD44 (ICD), ADAM9, CD44 (EXT), Amyloid beta 42, APP                                                                                       |
| 8                                                                                                        | Glycolysis and gluconeogenesis                                              | 94    | 2,093E-06 | 2,300E-04 | 2,093E-06                | 2,300E-04 | 12      | G3P2, LDHA, TP11, ALDOC, MDH1, PGK1, ENO1, ALDOA, PGAM1, LDHB, PKM2, PGAM4                                                                                                                                                        |
| 9                                                                                                        | FAK1 signaling in melanoma                                                  | 42    | 5,266E-06 | 5,143E-04 | 5,266E-06                | 5,143E-04 | 8       | TIMP2, Fibronectin, VEGF-A, CRK, RelA (p65 NF-kB subunit), PLAU (UPA), Syntenin 1, MMP-14                                                                                                                                         |
| 10                                                                                                       | Cell cycle_Role of 14-3-3 proteins in cell cycle regulation                 | 22    | 9,082E-06 | 7,983E-04 | 9,082E-06                | 7,983E-04 | 6       | 14-3-3 gamma, 14-3-3 beta/alpha, 14-3-3 theta, 14-3-3 epsilon, 14-3-3 sigma, 14-3-3 zeta/delta                                                                                                                                    |
|                                                                                                          |                                                                             |       |           |           |                          |           |         |                                                                                                                                                                                                                                   |
|                                                                                                          | HIF-1 target secreted proteins are highlighted in bold                      |       |           |           |                          |           |         |                                                                                                                                                                                                                                   |
